# Supplementary material for: Optimization and Comparison of Synthetic Procedures for a Group of Triazinyl-Substituted Benzene-Sulfonamide Conjugates with Amino Acids
Source: Molecules. 2017 Sep 13;22(9):1533. doi: 10.3390/molecules22091533 (PMC6151714; doi:10.3390/molecules22091533)
Supplement: Supplementary file 1 [file molecules-22-01533-s001.pdf]

## Supporting information for

# Optimization and Comparison of Synthetic Procedures for Group of Triazinyl-substituted Benzene-sulfonamide Conjugates with Amino Acids

Dominika Krajčiová<sup>1</sup>, Daniel Pecher<sup>1,2</sup>, Vladimír Garaj<sup>3</sup>, Peter Mikuš<sup>1,2,\*</sup>

<sup>1</sup> Department of Pharmaceutical Analysis and Nuclear Pharmacy, Faculty of Pharmacy, Comenius University in Bratislava, Odbojarov 10, SK-832 32 Bratislava, Slovak Republic; [krajciovafpharm.uniba.sk](mailto:krajciovafpharm.uniba.sk) (D.K.); [pecher1@uniba.sk](mailto:pecher1@uniba.sk) (D.P.); [mikus@fpharm.uniba.sk](mailto:mikus@fpharm.uniba.sk) (P.M.)

<sup>2</sup> Toxicological and Antidoping Center, Faculty of Pharmacy, Comenius University in Bratislava, Odbojarov 10, SK-832 32 Bratislava, Slovak Republic

<sup>3</sup> Department of Pharmaceutical Chemistry, Faculty of Pharmacy, Comenius University in Bratislava, Odbojarov 10, SK-832 32 Bratislava, Slovak Republic; [garaj@fpharm.uniba.sk](mailto:garaj@fpharm.uniba.sk) (V.G.)

\* Correspondence: [mikus@fpharm.uniba.sk](mailto:mikus@fpharm.uniba.sk) (P.M.); Tel.: +421-2-501-17-243 (P.M.)

## CONTENTS

|                                 |                      |                     |
|---------------------------------|----------------------|---------------------|
| Copies of NMR spectra           | compounds 1, 2, 3, 4 | Figures S1-S6       |
| Copies of IR spectra            | compounds 1, 2, 3, 4 | Figures S7-S12      |
| Copies of HPLC-UV chromatograms | compounds 3, 4       | Figures S13 and S14 |

<sup>1</sup>H NMR, 300 MHz  
DK032  
DMSO  
31 Mar 2017

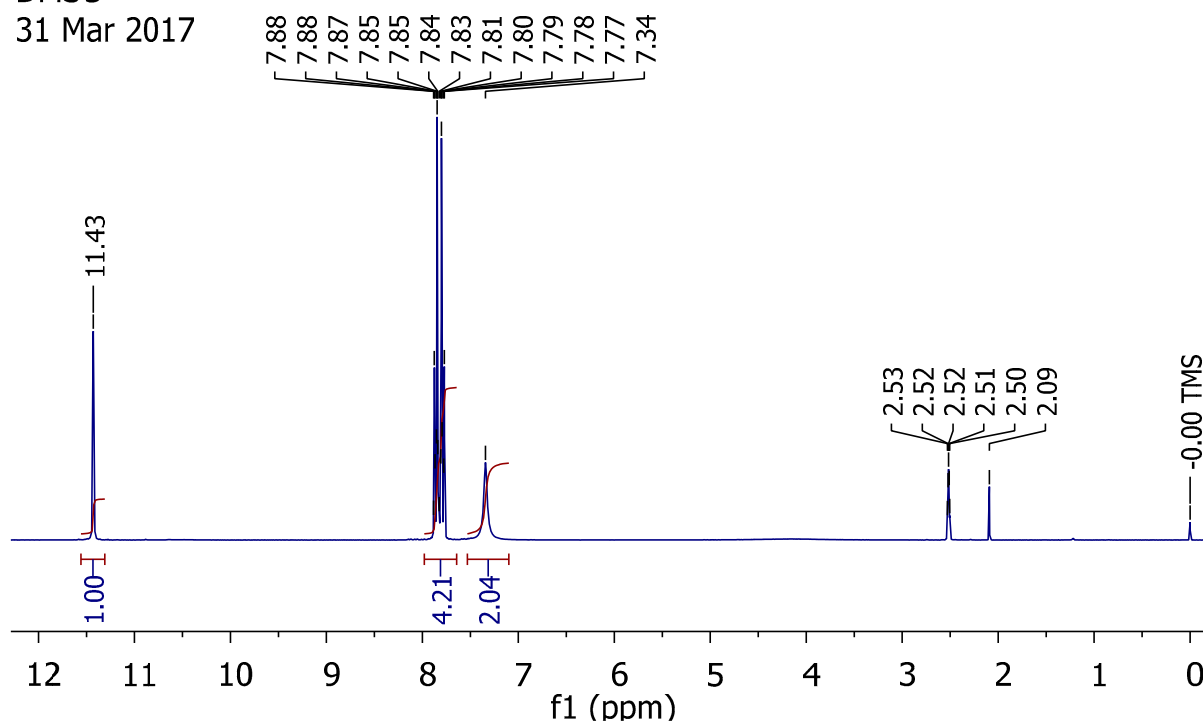

<sup>13</sup>C NMR, 75 MHz  
DK032  
DMSO  
31 Mar 2017

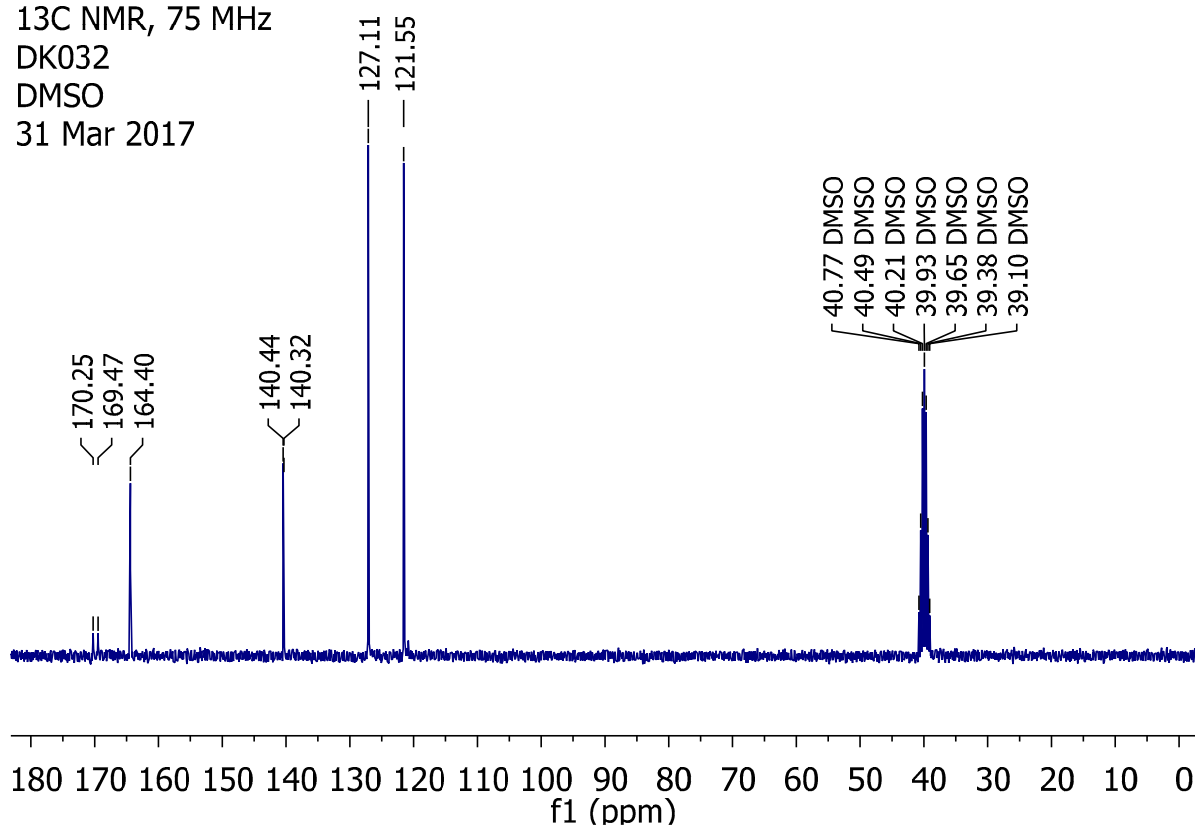

**Figure S1:** <sup>1</sup>H and <sup>13</sup>C NMR spectra of 4-(4',6'-dichloro-1',3',5'-triazin-2'-ylamino)-benzenesulfonamide **1**

<sup>1</sup>H NMR, 300 MHz  
DK022d, 80 C  
DMSO  
15 Feb 2017

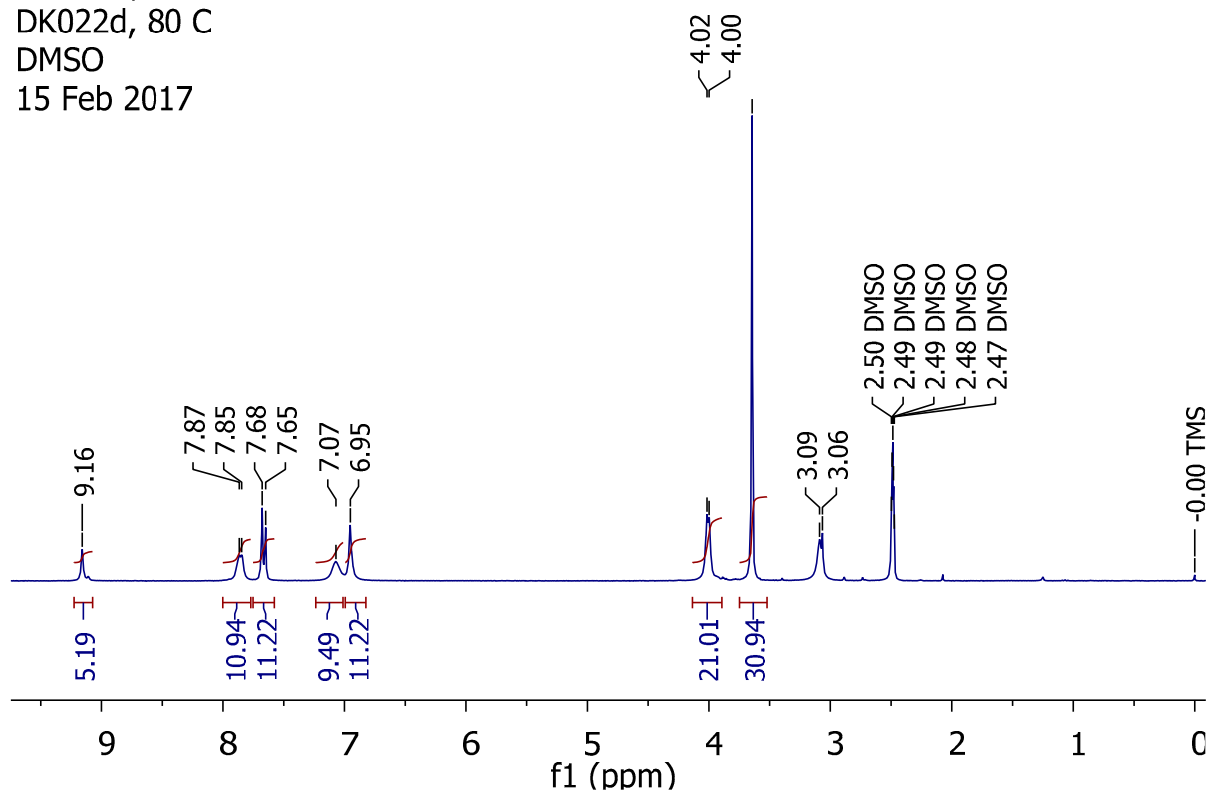

<sup>13</sup>C NMR, 75 MHz  
DK022d, 80 C  
DMSO  
15 Feb 2017

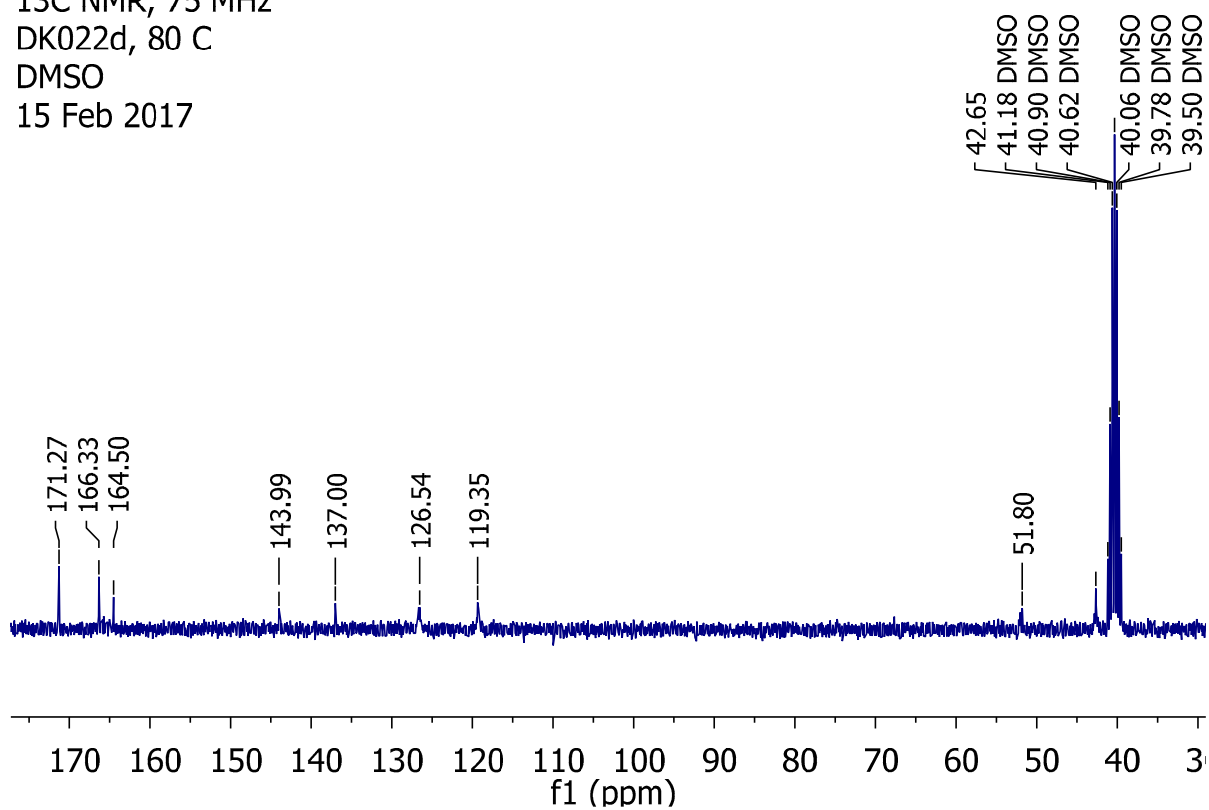

**Figure S2:** <sup>1</sup>H and <sup>13</sup>C NMR spectra of dimethyl 2'',2'''-[6'-(4-sulfamoylphenylamino)-1',3',5'-triazine-2',4'-diyl]-bis(azanediy)diacetate **2**

<sup>1</sup>H NMR, 300 MHz  
DK022h, T = 80 C  
DMSO  
20 Feb 2017

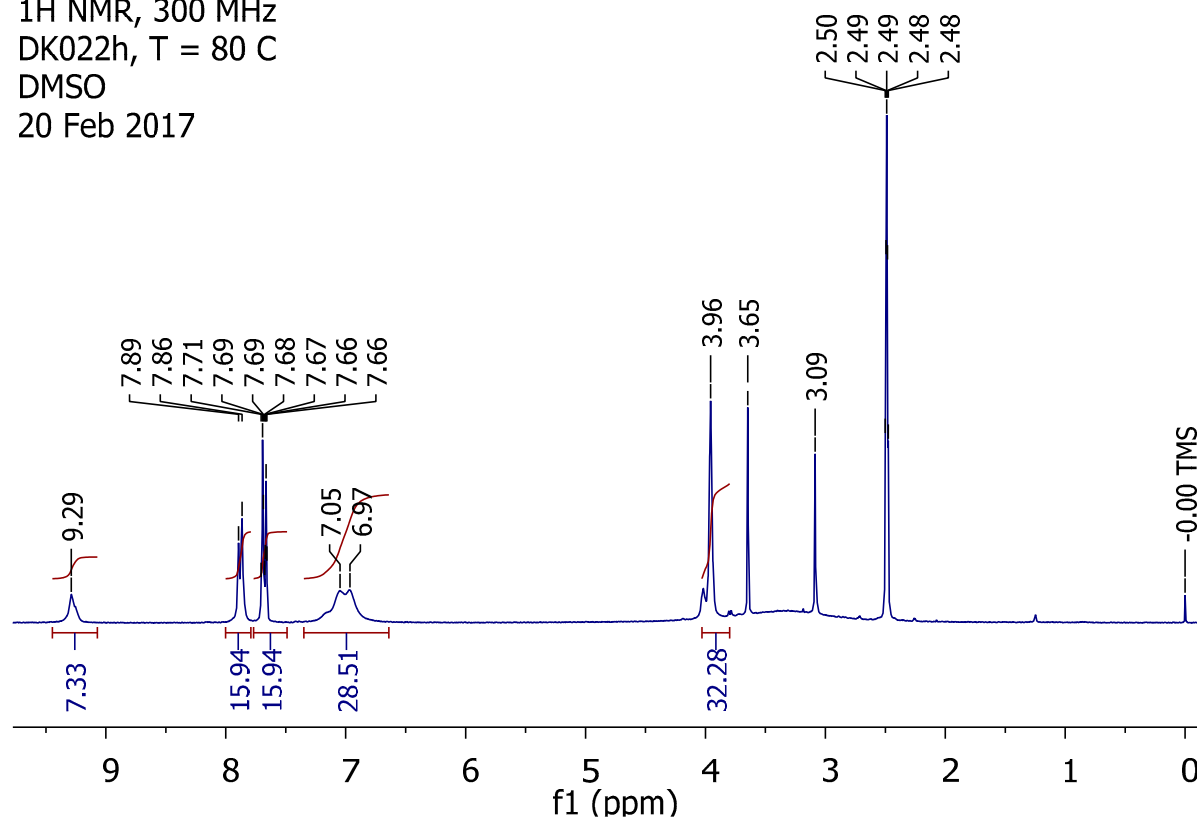

<sup>13</sup>C NMR, 75 MHz  
DK022h, T = 80 C  
DMSO  
20 Feb 2017

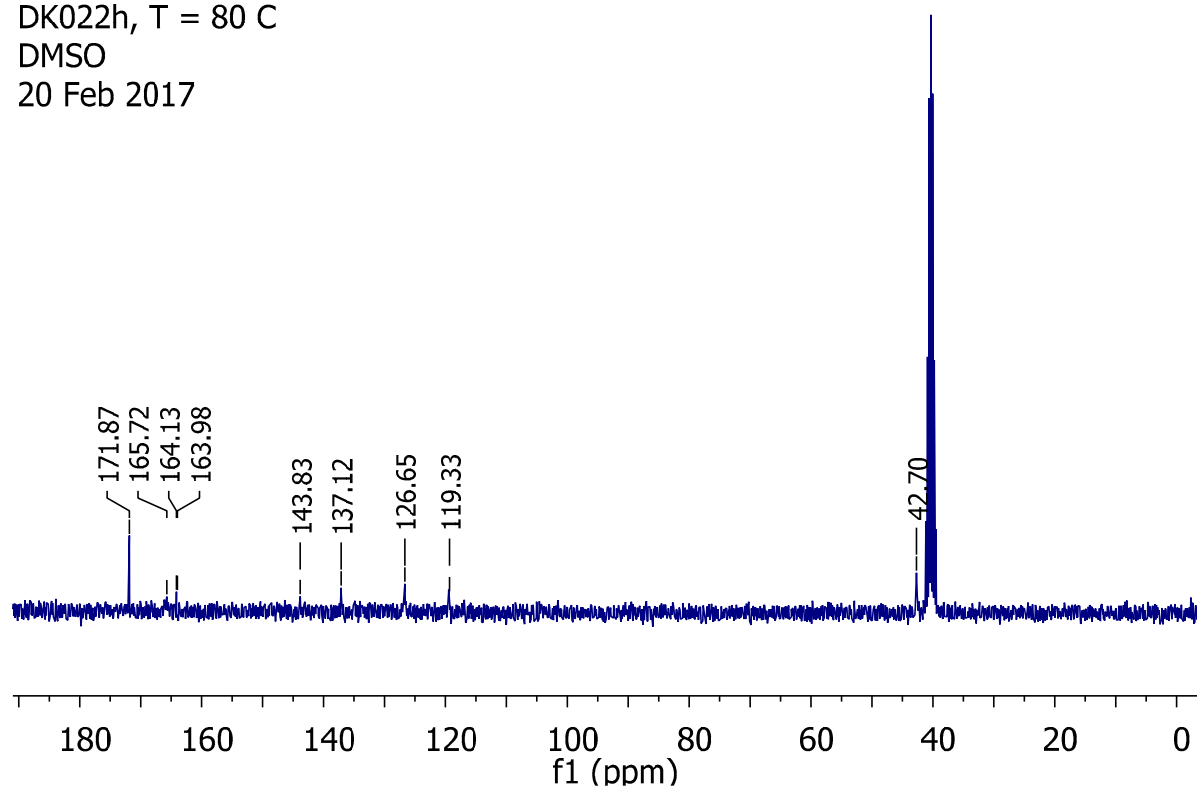

**Figure S3:** <sup>1</sup>H and <sup>13</sup>C NMR spectra of 2'',2'''-[6'-(4-sulfamoylphenylamino)-1',3',5'-triazine-2',4'-diyl]-bis(azanediy)diacetic acid **3** prepared according to the *Scheme 3*

<sup>1</sup>H NMR, 300 MHz  
DK009  
temp=80 C  
DMSO  
14 Mar 2017

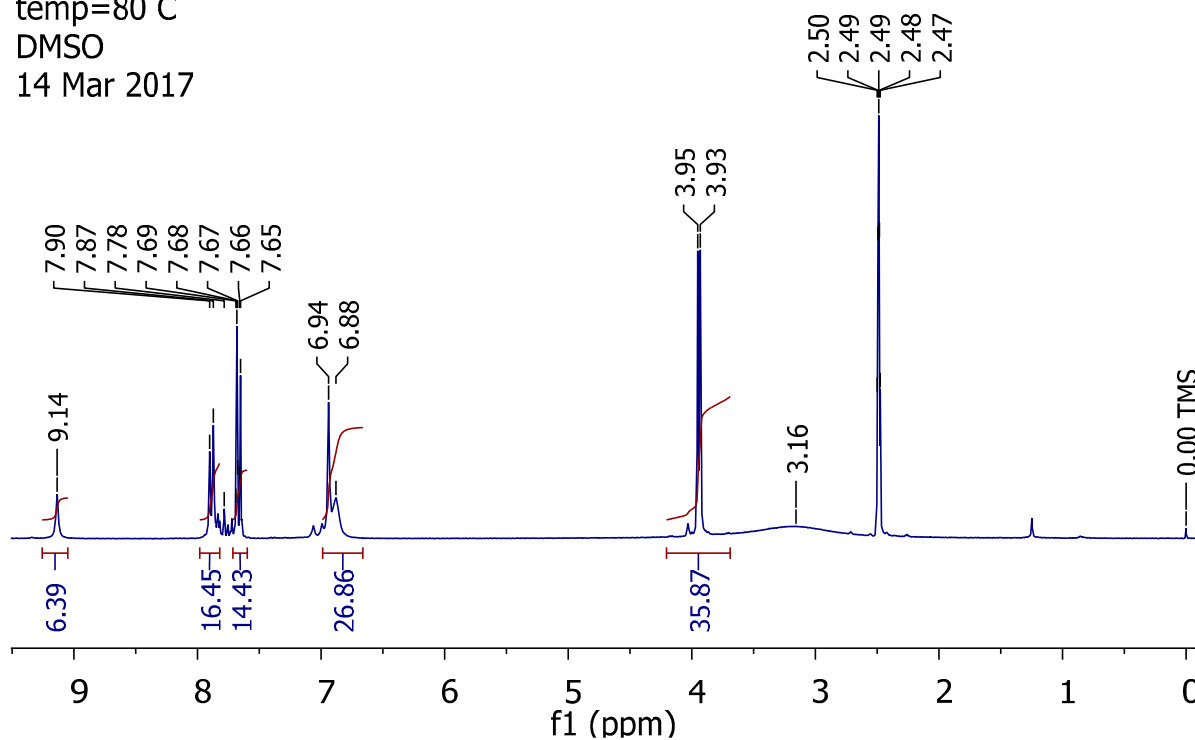

<sup>13</sup>C NMR, 75 MHz  
DK009  
temp=80 C  
DMSO  
14 Mar 2017

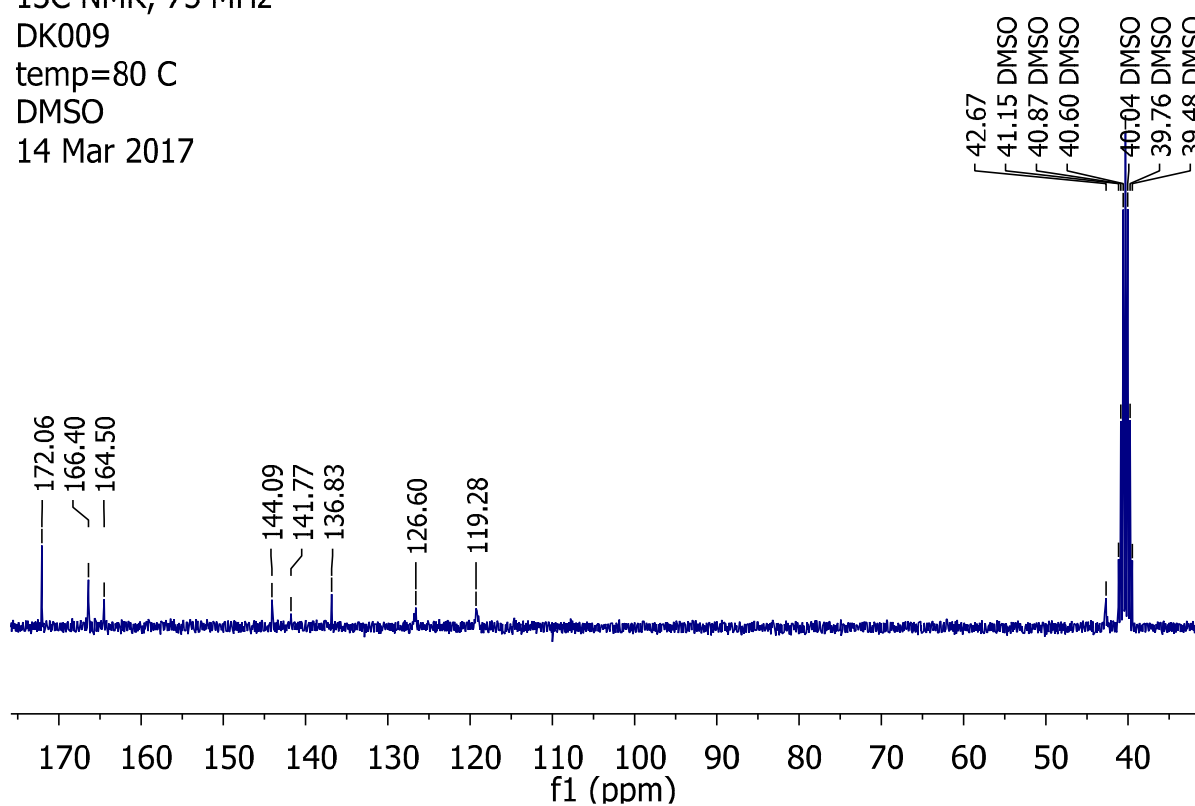

**Figure S4:** <sup>1</sup>H and <sup>13</sup>C NMR spectra of 2'',2'''-[6'-(4-sulfamoylphenylamino)-1',3',5'-triazine-2',4'-diyl]-bis(azanediy)diacetic acid **3** prepared according to the *Scheme 4*

<sup>1</sup>H NMR, 300 MHz  
DK071b, temp = 80 C  
DMSO  
27 Feb 2017

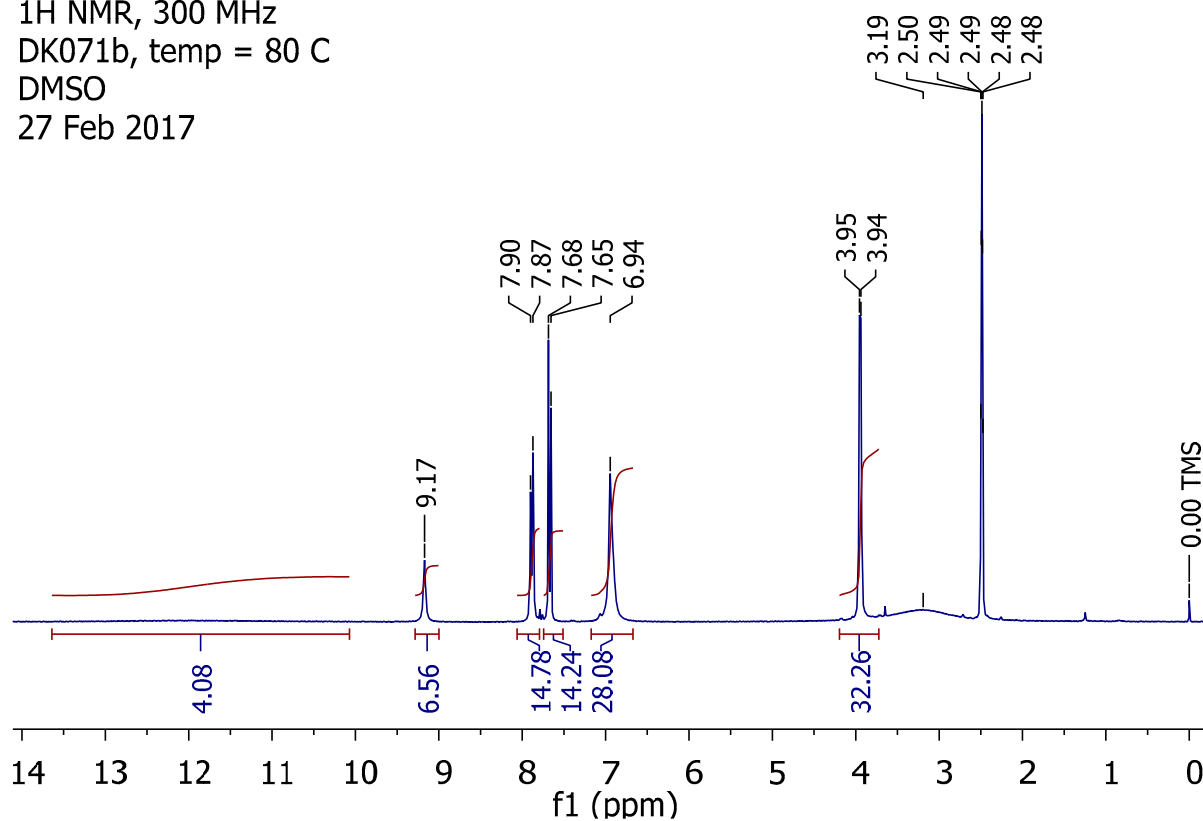

<sup>13</sup>C NMR, 75 MHz  
DK071b, temp = 80 C  
DMSO  
27 Feb 2017

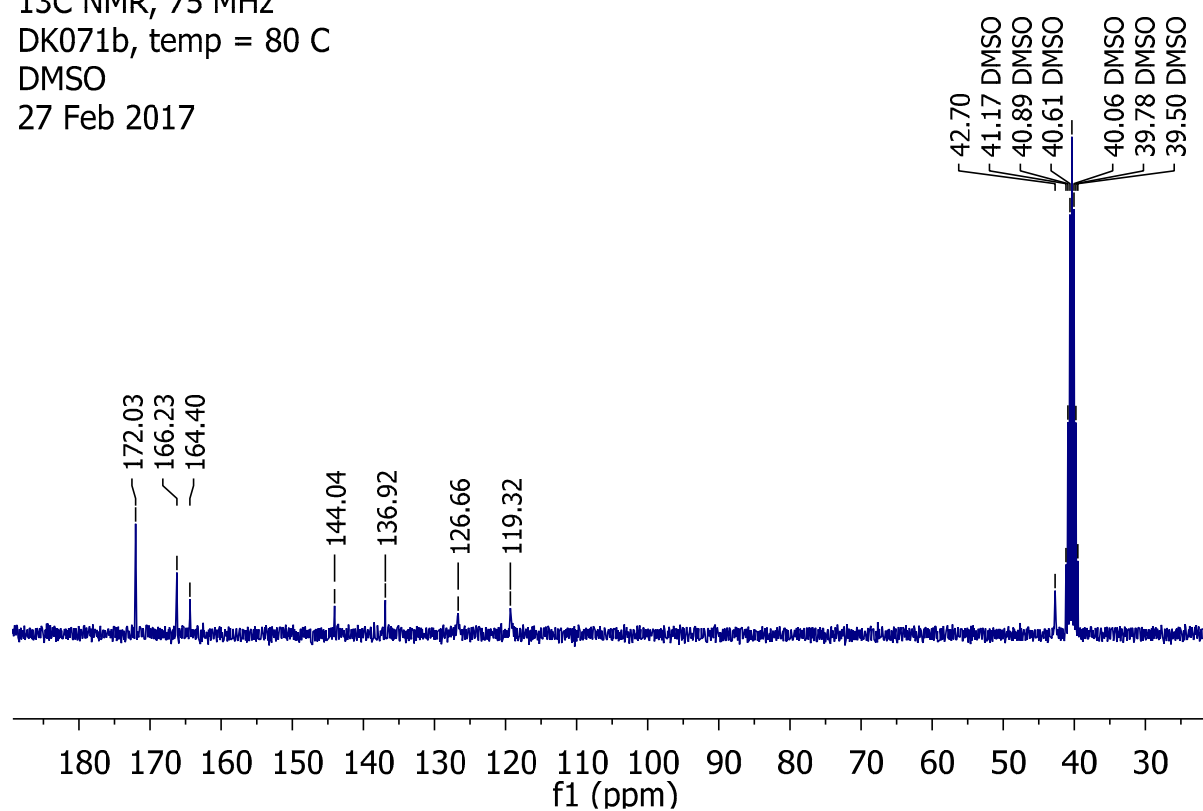

**Figure S5:** <sup>1</sup>H and <sup>13</sup>C NMR spectra of 2'',2'''-[6'-(4-sulfamoylphenylamino)-1',3',5'-triazine-2',4'-diyl]-bis(azanediy)diacetic acid **3** prepared according to the *Scheme 5*

<sup>1</sup>H NMR, 300 MHz  
DK072a  
DMSO  
27 Jan 2017

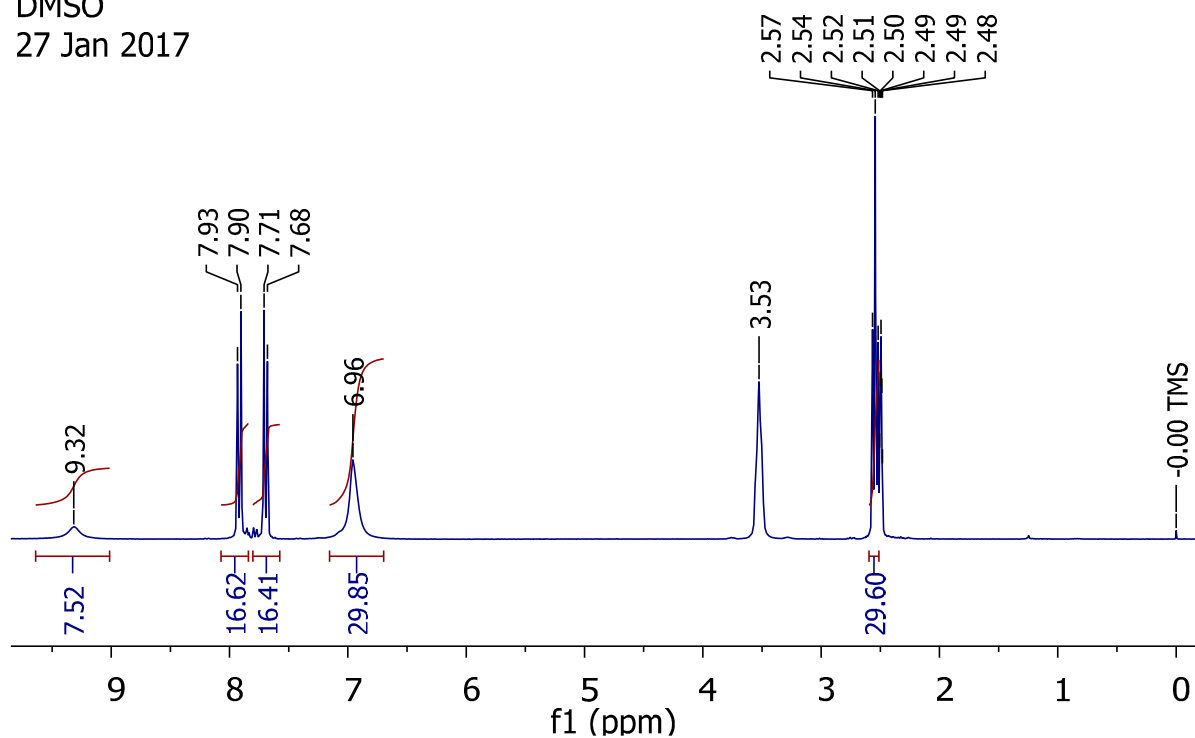

<sup>13</sup>C NMR, 75 MHz  
DK072a  
DMSO  
27 Jan 2017

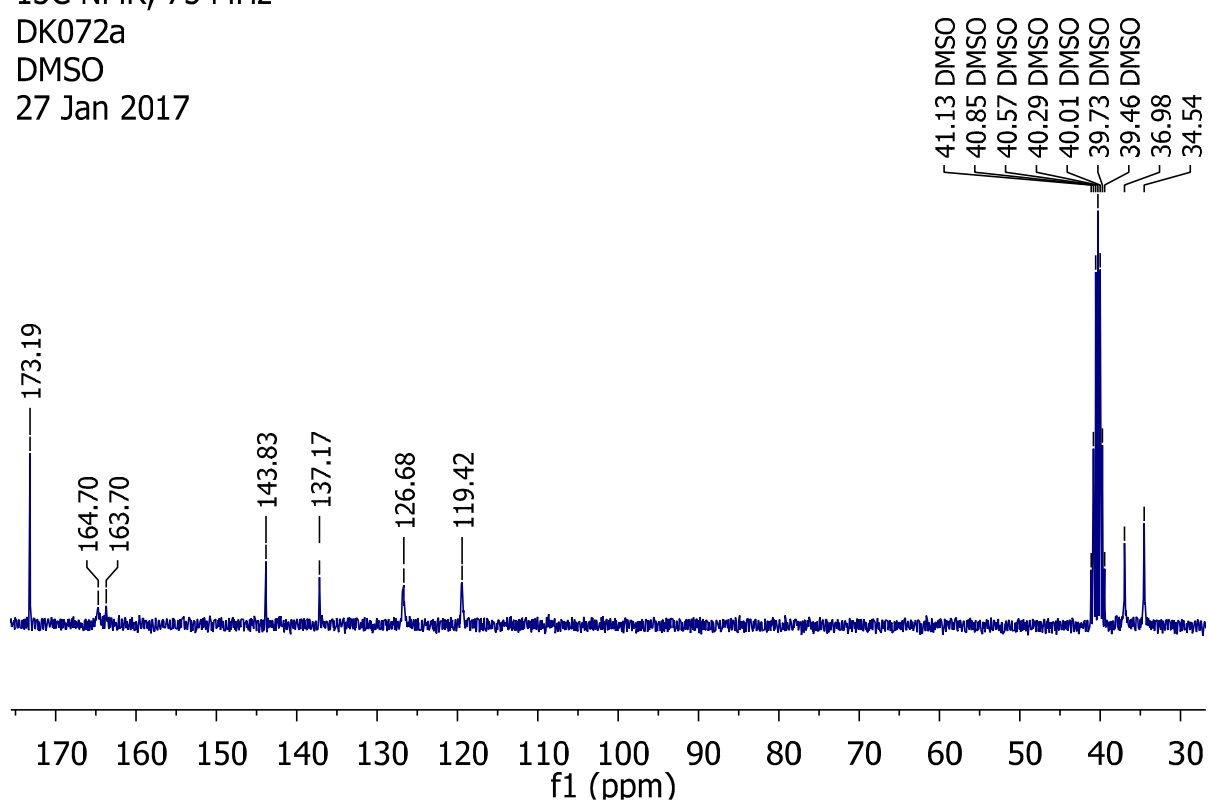

**Figure S6:** <sup>1</sup>H and <sup>13</sup>C NMR spectra of 3'',3'''-[6'-(4-sulfamoylphenylamino)-1',3',5'-triazine-2',4'-diyl]-bis(azanediy)l)dipropionic acid **4**

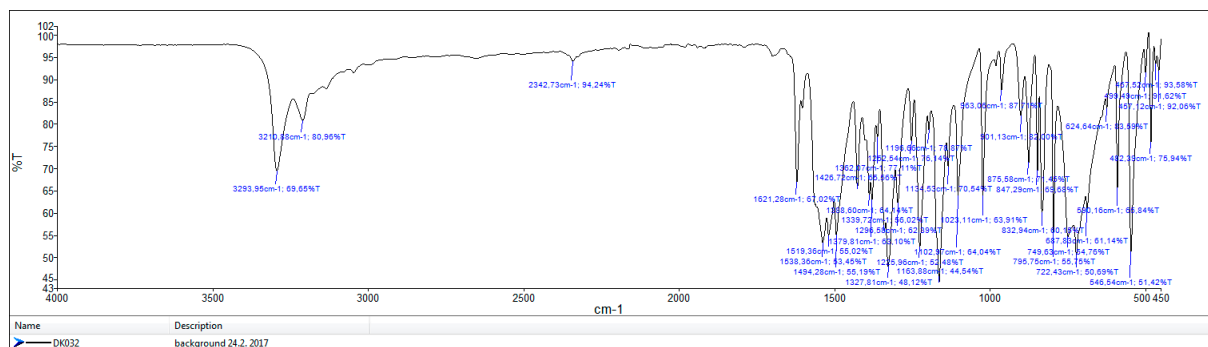

**Figure S7:** IR spectrum of 4-(4',6'-dichloro-1',3',5'-triazin-2'-ylamino)-benzenesulfonamide **1**

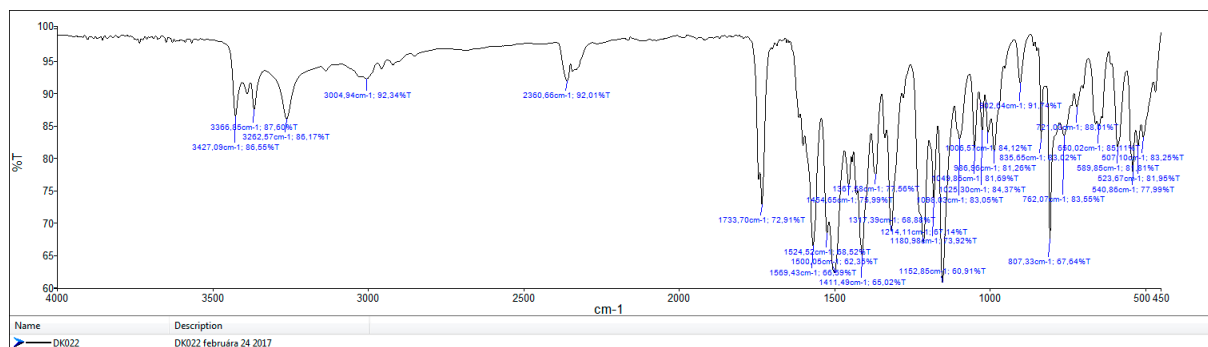

**Figure S8:** IR spectrum of dimethyl 2'',2'''-[6'-(4-sulfamoylphenylamino)-1',3',5'-triazine-2',4'-diyl]-bis(azanediy) diacetate **2**

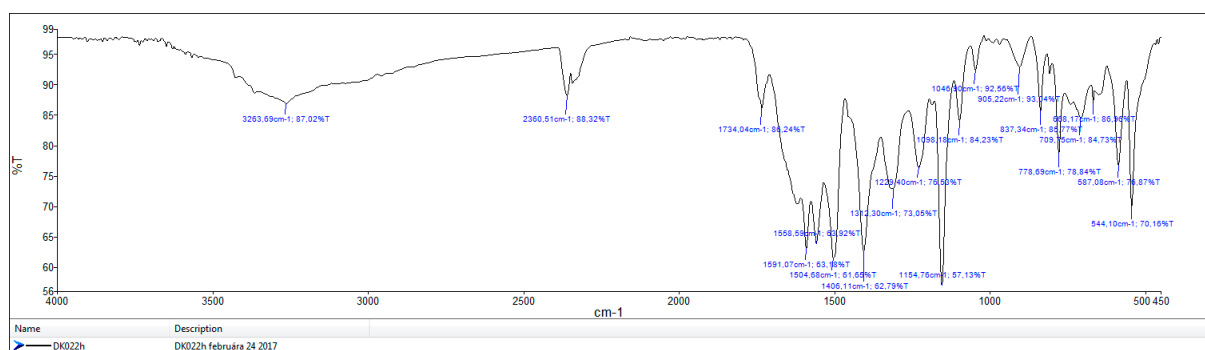

**Figure S9:** IR spectrum of 2'',2'''-[6'-(4-sulfamoylphenylamino)-1',3',5'-triazine-2',4'-diyl]-bis(azanediy)diacetic acid **3** prepared according to the *Scheme 3*

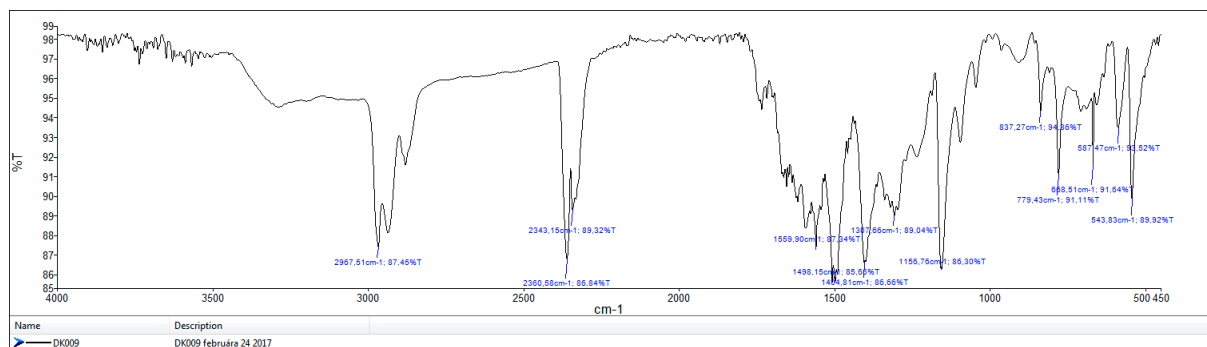

**Figure S10:** IR spectrum of 2'',2'''-[6'-(4-sulfamoylphenylamino)-1',3',5'-triazine-2',4'-diyl]-bis(azanediyl)diacetic acid **3** prepared according to the *Scheme 4*

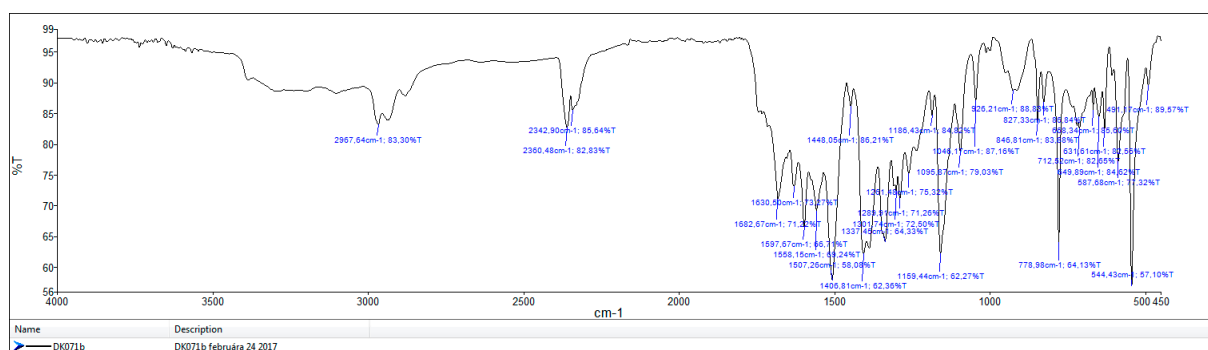

**Figure S11:** IR spectrum of 2'',2'''-[6'-(4-sulfamoylphenylamino)-1',3',5'-triazine-2',4'-diyl]-bis(azanediy)diacetic acid **3** prepared according to the *Scheme 5*

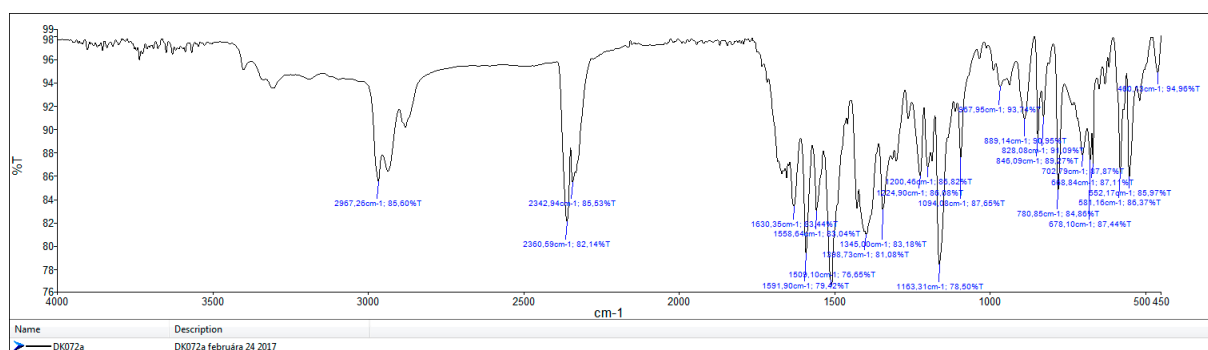

**Figure S12:** IR spectrum of 3'',3'''-[6'-(4-sulfamoylphenylamino)-1',3',5'-triazine-2',4'-diyl]bis(azanediyl) dipropanoic acid **4**

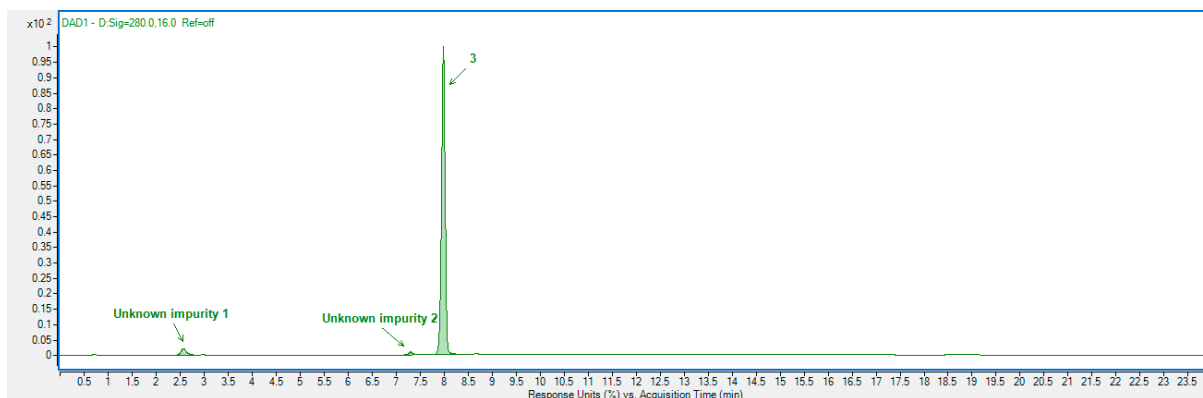

**Figure S13:** HPLC-UV (280 nm) profile of 2'',2'''-[6'-(4-sulfamoylphenylamino)-1',3',5'-triazine-2',4'-diyl]-bis(azanediy1)diacetic acid **3**. Calculated purity of the compound **3** (based on peak areas acquired by HPLC-UV) was 95.51%. Two unknown impurities (3.45% and 1.04%) were detected in the chromatogram. For the analytical conditions see section 3.1.

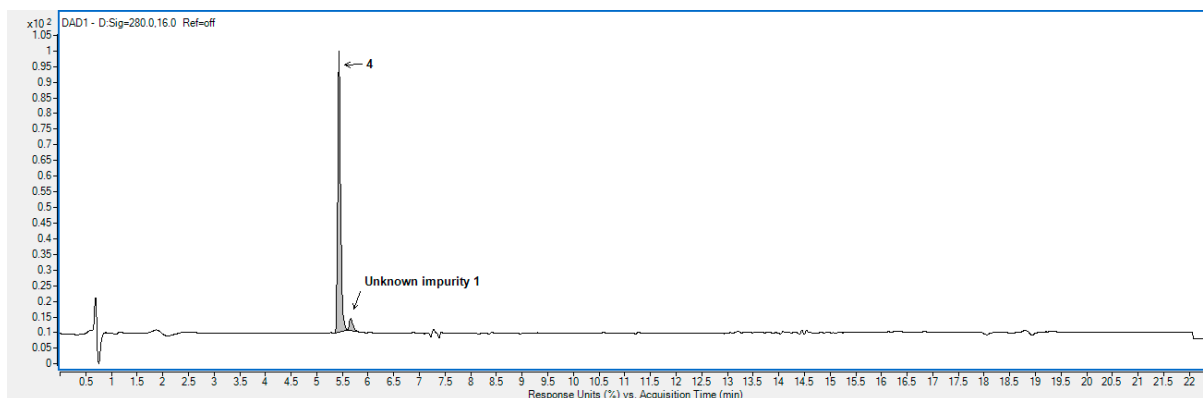

**Figure S14:** HPLC-UV (280 nm) profile of 3'',3'''-[6'-(4-sulfamoylphenylamino)-1',3',5'-triazine-2',4'-diyl]-bis (azanediyl)dipropionic acid **4**. Calculated purity of the compound **4** (based on peak areas acquired by HPLC-UV) was 94.98%. One unknown impurity (5.02%) was detected in the chromatogram. For the analytical conditions see section 3.1.
